# Supplementary material
Source: publisher site journal article supplement (https://www.spandidos-publications.com/3569/downloadSupplementary)

Figure S1. Representative HPLC chromatograms of active BHD components and standard controls. BHD contains astragaloside IV, paeoniflorin and amygdalin, but not tetramethylpyrazine; BHD, Buyang Huanwu Decoction.

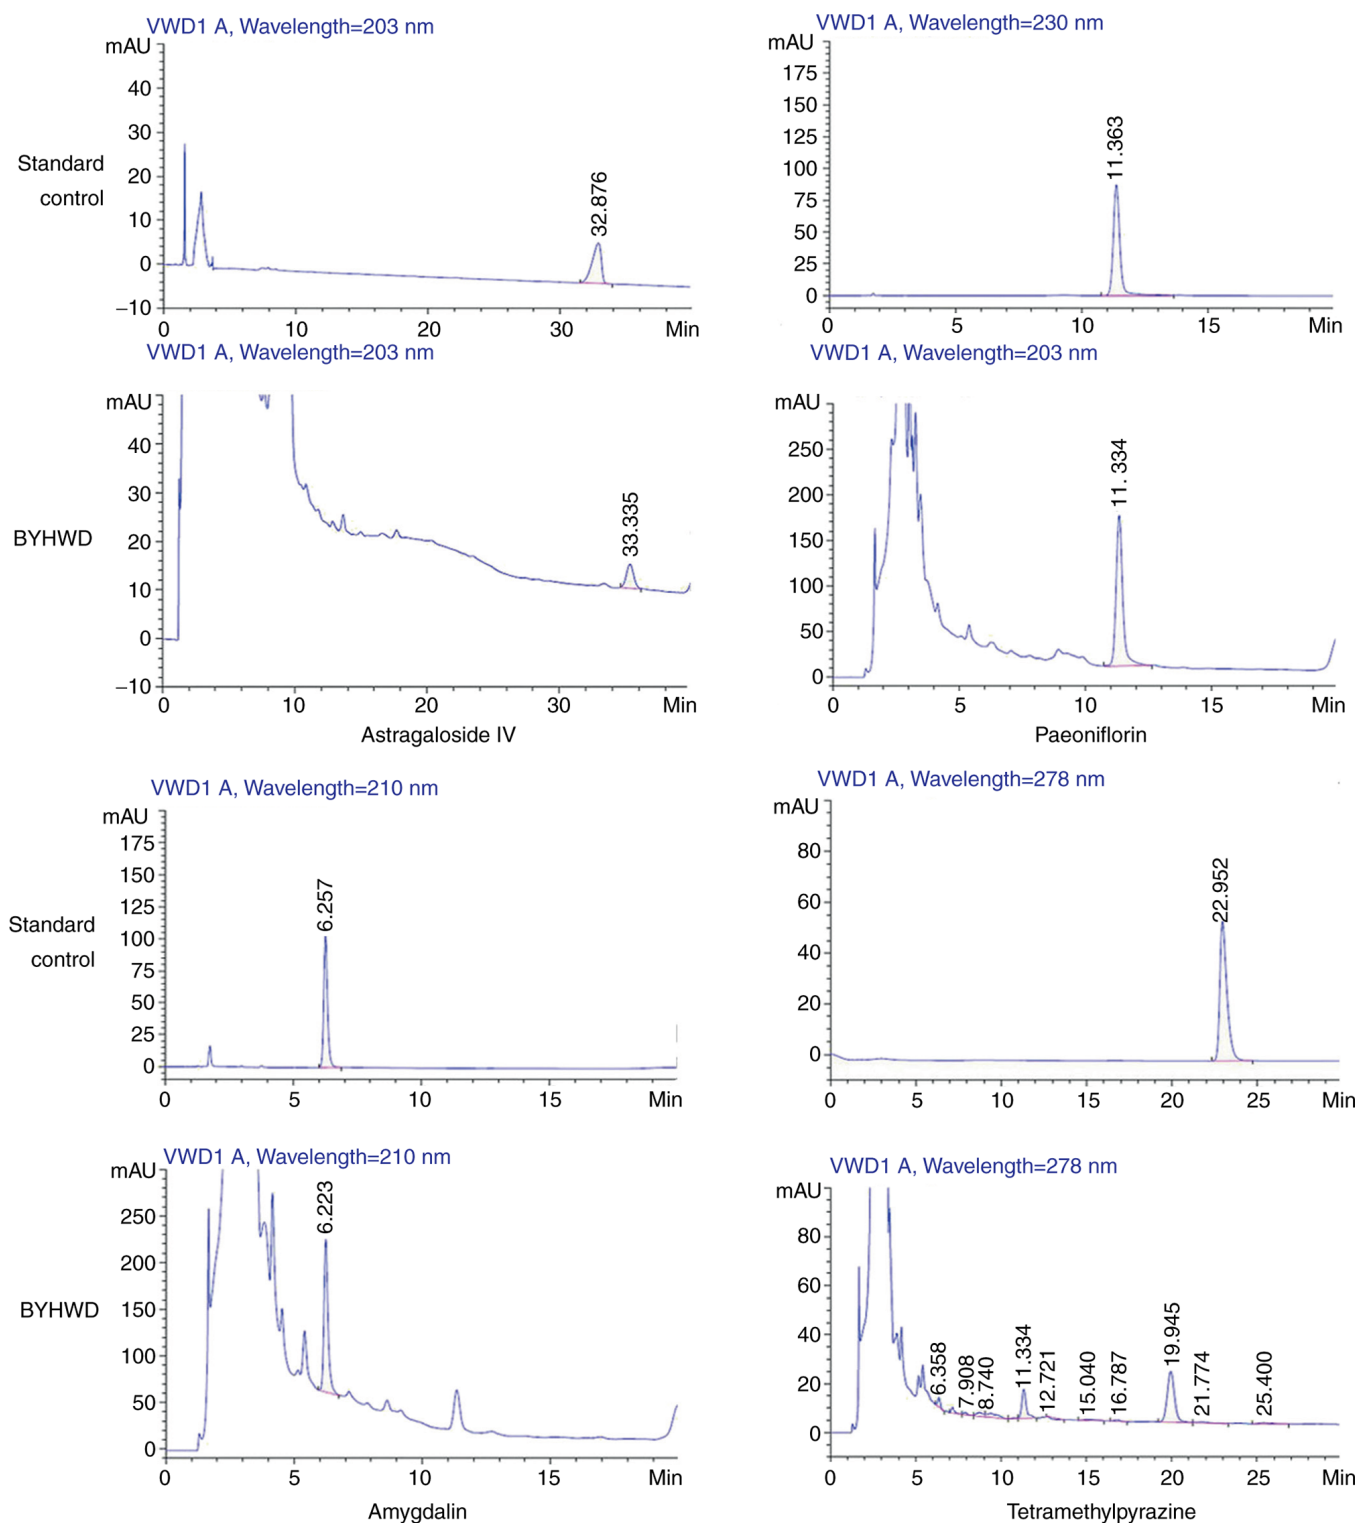

Supplement: Supplementary file 1 [file downloadSupplementary]
